# Supplementary material for: Measuring access to effective care among elderly medicare enrollees in managed and fee-for-service care: a retrospective cohort study
Source: Springer Nature journal article supplement (doi:10.1186/1472-6963-1-11), 2001-11-01
Supplement: Additional file 1 [file 1472-6963-1-11-s1.doc]

**Indicator Definitions***

#### I. Preventive Care

**Breast Cancer Screening Rate**

Denominator: Female aged beneficiaries enrolled continuously for the 24-month study period (January 1, 1994 to December 31, 1995); random fifty percent sample for the HMO eligible population.

Numerator: Those with a mammogram (CPT = 76091, 76092; AMRS = R035—Mammogram [in use through August 1994]; R340—Mammogram Bilateral [in use starting August 1994] and R341—Mammogram Unilateral [in use starting August 1994]).

Annual Visit Rate

Denominator: All aged beneficiaries continuously enrolled for at least 12 months in the study period.

Numerator: Those with at least one visit to a primary care physician or specialist, excluding optometry/ophthalmology (to create parity between HMO and FFS samples, because routine eye exams for prescribing glasses are not covered under fee-for-service

Medicare.) The Staff Model used specialty codes for visits to define inclusion in the numerator. For the Group Model and the Fee-for-Service sample, physician/supplier records were searched for a CPT-4 code indicating the beneficiary had an evaluation and management visit.

*CPT= Current Procedural and Technical codes

AMRS = Automated Medical Record System

#### II. Diagnosis Specific Care

**Post-hospital Follow-up for Myocardial Infarction**

Denominator: All aged beneficiaries continuously enrolled for at least 2 months in the study period following discharge for MI (ICD-9 = 410).

Numerator: Those with one or more visits with a primary care provider or cardiologist within 60 days of discharge. Provider specialty codes were used for the Staff and Group Model HMO, and for the Fee-for-Service sample, claims were searched for an outpatient or office visit with a specialty coding of internal medicine, cardiology, family practice, general practice, or multispecialty clinic or group practice during the 60 day period.

**Post-hospital Follow-up for Depression**

Denominator: All aged beneficiaries continuously enrolled for at least 3 months in the study period following the first non-transfer discharge for depression (ICD-9 = 296, 298.0, 300.4, 301.12, 309.0, 309.1, 311). Those with another such hospitalization during this period were dropped from the sample; those without a subsequent hospitalization formed the denominator for the indicator.

Numerator: Those with one or more visits with a primary care or mental health provider within 14 days of discharge. Provider specialty codes for internal medicine or mental health specialists were used for the Staff and Group Model HMO, and for the Fee-for-Service sample, claims were searched for an outpatient or office visit with a specialty coding of internal medicine, family practice, general practice, mental health, or multispecialty clinic or group practice during the 60 day period.

#### III. Chronic Disease Care

**Retinal Examination Rate for Diabetics**

Denominator: All aged beneficiaries continuously enrolled for at least 12 months in the study period following the appearance of a diagnosis of diabetes mellitus (ICD-9 = 250, AMRS = B120.) For example, a beneficiary with a diagnosis appearing in March 1994 would be followed for the following 12 months (including part of 1995.)

Numerator: Those receiving a retinal exam (CPT = 92002-92014, 92225, 9226) or having a procedure or diagnosis code that suggests a dilated retinal exam was performed (AMRS = T589-retina: prophylaxis, cryotherapy; T590-retina: prophylaxis, photocoagulation; T591-retina: destruction of retinal lesion; T592-retina: destruction of retinopathy; T643-ocular photography: fluorescein angiography; T630-ophthalmoscopy with fundus photography; D115-retinal scars; D146-retinal arteriolar sclerosis; D149-retinal defect; D160-branch retinal vein occlusion; D164-retinal hole or tear; D165-central retinal artery occlusion; D208-central retinal vein occlusion; D209-epiretinal membrane; D228-branch retinal artery occlusion; D231-retinal vasculitis; D234-commotio retinae; D544-retinal vascular occlusion; D550-retinopathy; D551-arteriosclerotic retinopathy; D552-diabetic retinopathy; D553-hypertensive retinopathy; D554-detached retina; D555-retinal degenerative disease; D562-diabetic retinopathy, background; D563-diabetic retinopathy, proliferative; D163-central serous retinopathy; D510-chorioretinitis; D161-chorioretinitis from toxoplasmosis; D212-choroidal nevus; D162-drusen; D003-floaters; D558-lattice degeneration; D530-macular degeneration; D182-macular edema; D211-macular hole; D166-ocular histoplasmosis; D222-posterior vitreous detachment; D883-retinal detachment; D287-retinitis; D204-retinitis pigmentosa; D906-retinoschisis; D129-rubeosis iridis; D172-vitreous hemorrhage; D242-myelinated nerve fibers; D340-optic atrophy; D170-optic disc edema; D218-optic nerve drusen; D171-pseudopapilledema; D026-eye examination, normal, with modifier SET 175); D184-choroidal atrophy; D109-drusen; D600-uveitis; D140-optic disc drusen; D543-neuritis; D0290-papilledema; D155-pseudophakia; D177-pseudoexfoliative syndrome; D181-opaque posterior capsule; D410-cataract; D450-iritis; D704-aphakia).

**Visit Rate for Diabetics**

Denominator: Aged beneficiaries continuously enrolled for at least 12 months in the study period following the appearance of a diagnosis of diabetes mellitus (ICD-9 = 250).

Numerator: Those with two or more visits with a primary care provider or endocrinologist during the 12-month study period. Provider specialty codes for internal medicine or endocrinology were used for the Staff Model HMO, and these codes plus one for “Institution-Interdivisional Care” were used for the Group Model HMO. In the Fee-for-Service sample, claims were searched for an outpatient or office visit with a specialty coding of general/family practice, internal medicine, endocrinology or geriatrics, or multispecialty clinic or group practice during the twelve month period.
